# Supplementary material for: Enhancing stability via confining Rh–P species in ZIF-8 for hydroformylation of 1-octene
Source: Royal Society of Chemistry journal article supplement (doi:10.1039/d3dt02205f), 2023-01-01
Supplement: d3dt02205f1.pdf [file d3dt02205f1.pdf]

## **Enhancing stability via confining Rh-P species in ZIF-8 for hydroformylation of 1-octene**

Xiaorui Yan<sup>†</sup>, Lele Chen<sup>†</sup>, Haisheng Wei<sup>\*</sup>, Tiantian Liu, Kairui Li, Jing Li<sup>\*</sup>

College of Chemistry and Chemical Engineering, Yantai University, Yantai 264005, Shandong, China

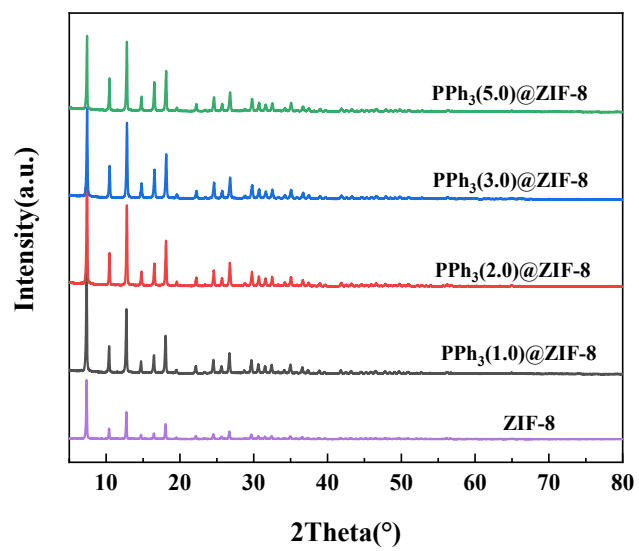

Figure S1. XRD characterizations of the samples with different content of PPh<sub>3</sub> ligand.

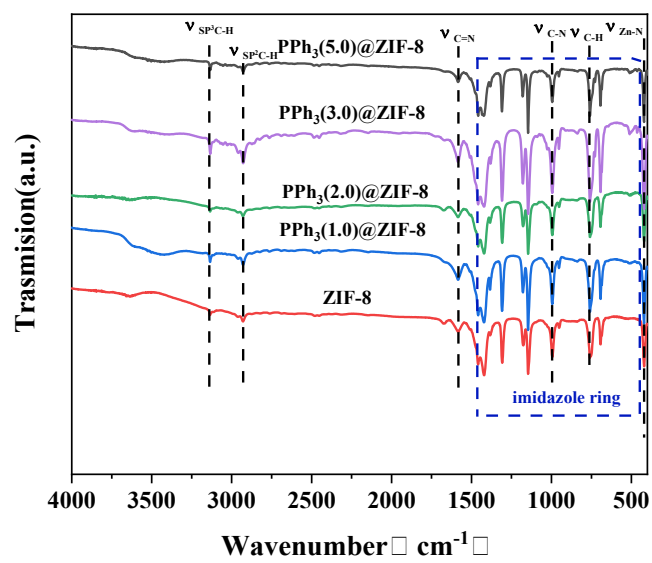

Figure S2. FT-IR patterns for different content of phosphine ligand in  $\text{PPh}_3(x)@ZIF-8$  samples

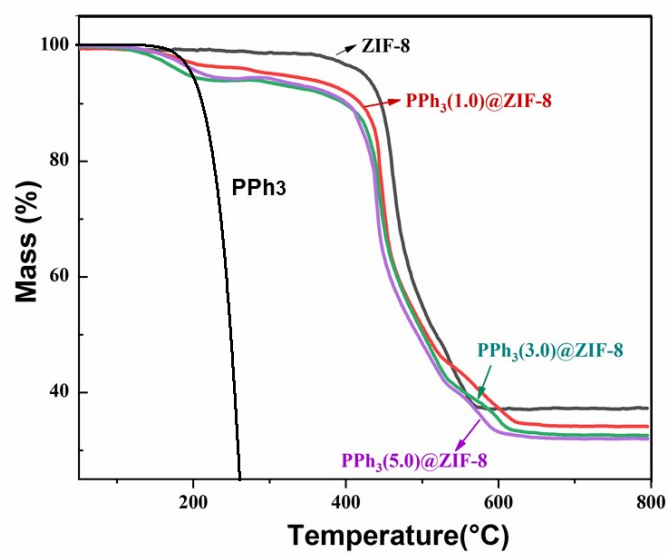

Figure S3. TG curves of different PPh<sub>3</sub>(x)@ZIF-8 samples, pure ZIF-8 and PPh<sub>3</sub> ligand.

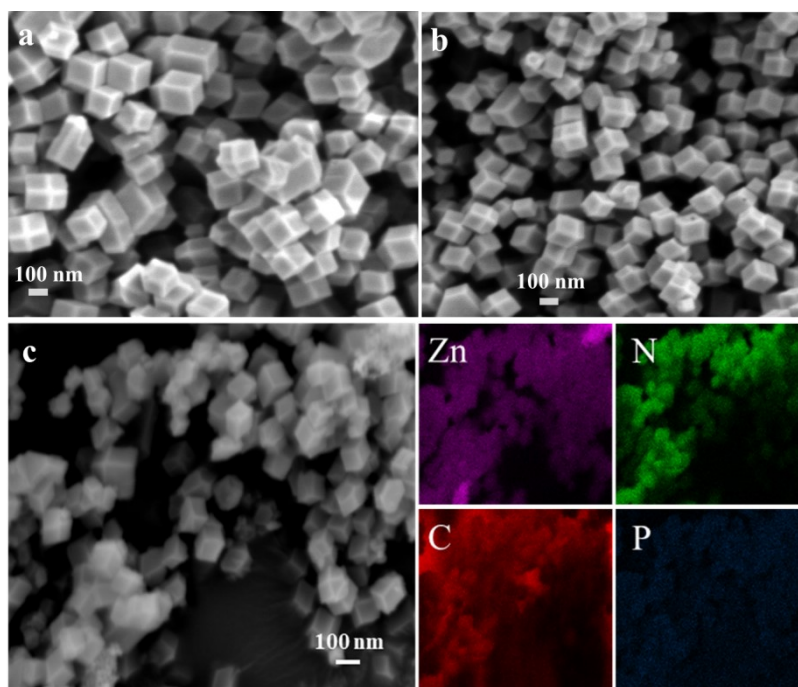

Figure S4. SEM images (a,b) and EDS mapping of PPh<sub>3</sub>(3.0)@ZIF-8 sample (c).

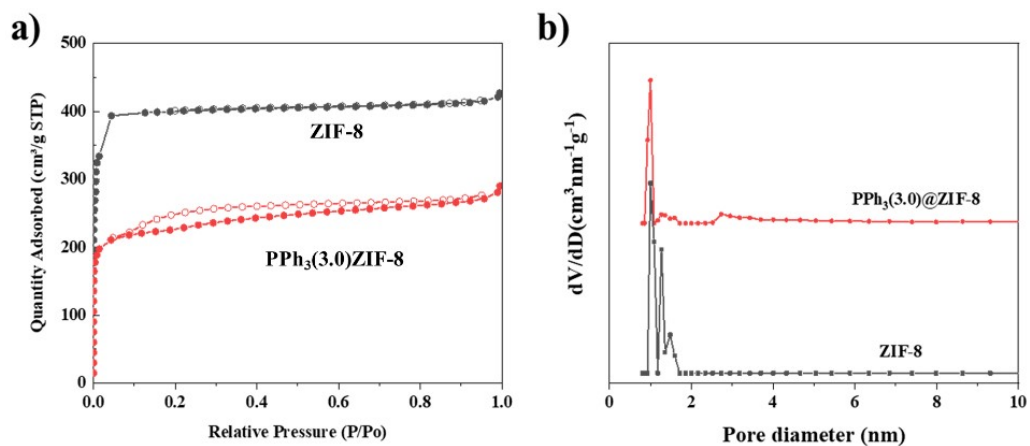

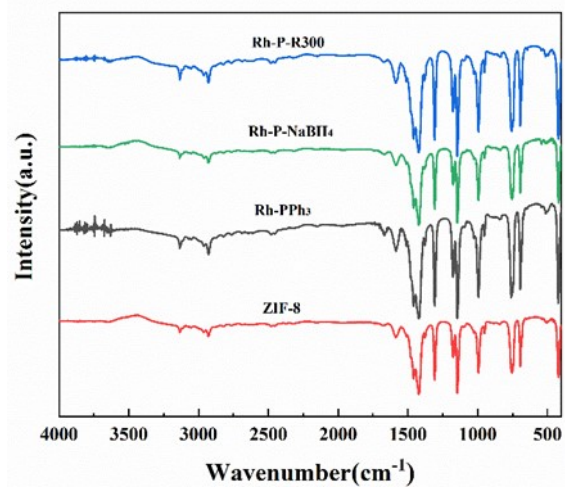

Figure S6. FT-IR results of Rh-PPh<sub>3</sub> samples by different reduction procedure.

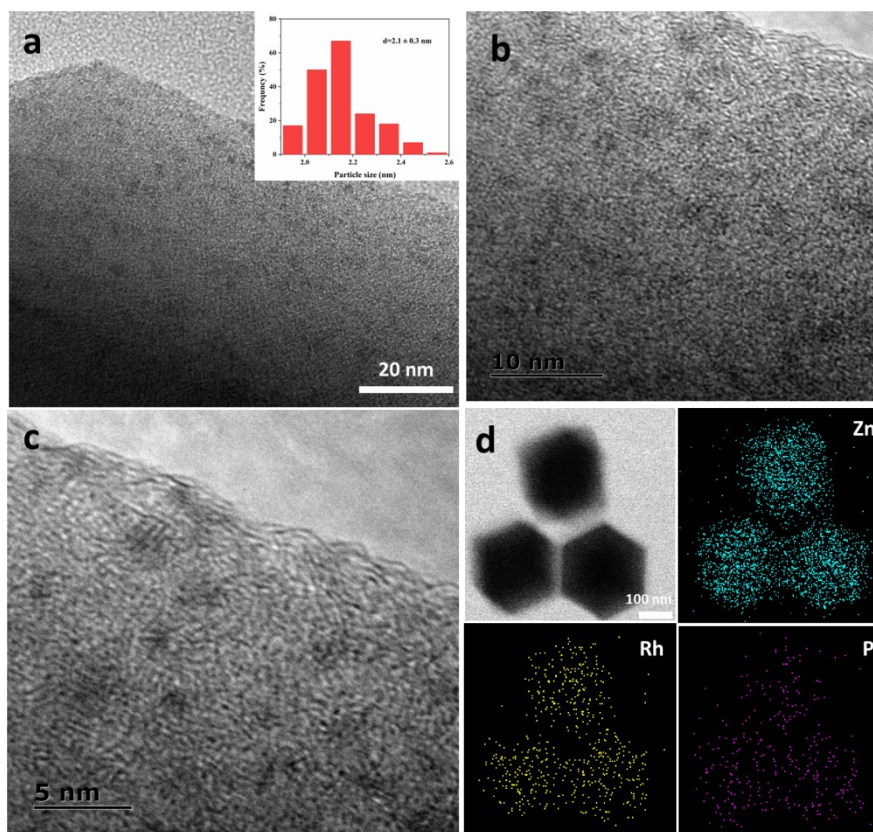

Figure S7. HRTEM (a,b,c) and EDS mapping (d) analyses of Rh-P-NaBH<sub>4</sub> catalyst. The inner picture is the size distribution of Rh particles.



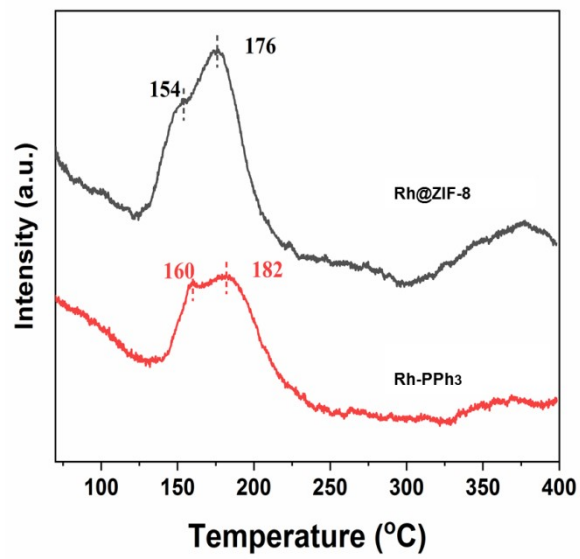

Figure S8. H<sub>2</sub>-TPR results of Rh@ZIF-8 and Rh-PPh<sub>3</sub> catalysts.

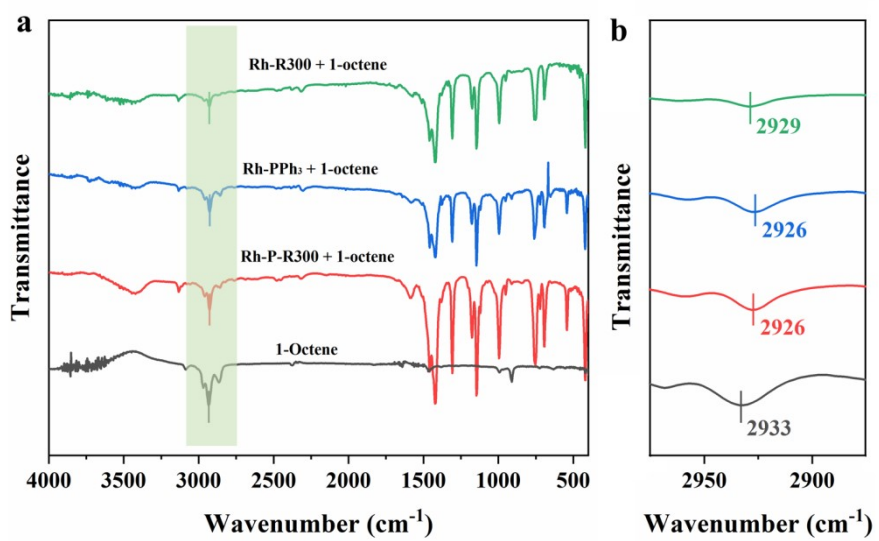

Figure S9 FT-IR analysis of 1-octene adsorption on different catalysts (a) and enlargement of the shadow part (b).

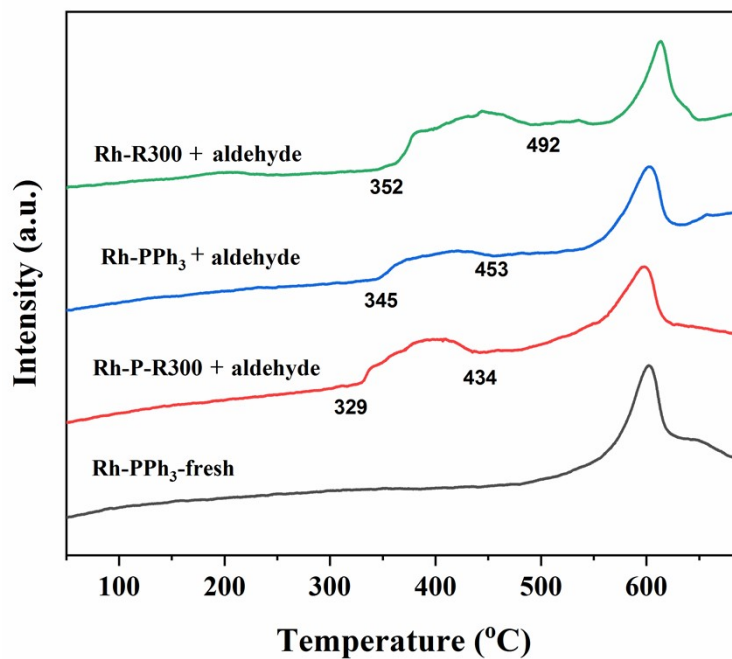

Figure S10 TPD analysis of n-nonaldehyde desorption on different catalysts. The desorption temperature at around 600 °C is due to the decomposition of support, which is confirmed by the TPD results of Rh-PPh<sub>3</sub> catalyst without addition of n-nonaldehyde.

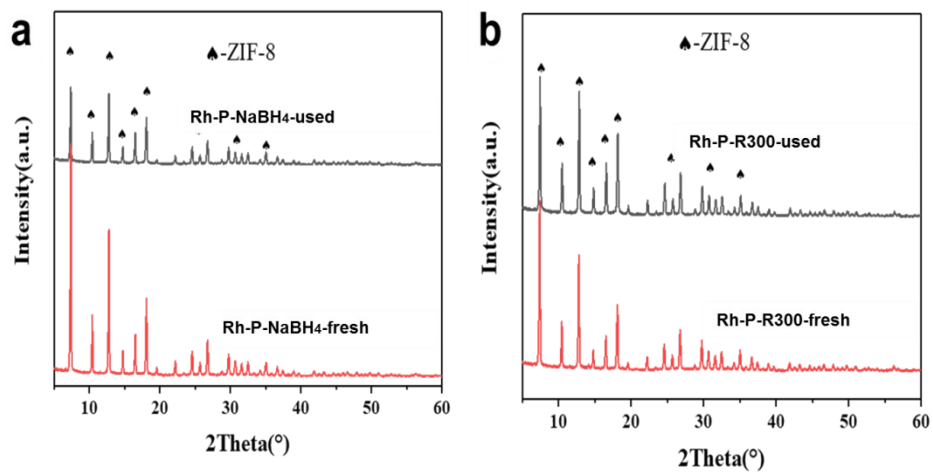

Figure S11. XRD results of Rh-P-NaBH<sub>4</sub> (a) and Rh-P-R300 (b) catalysts before and after reaction.

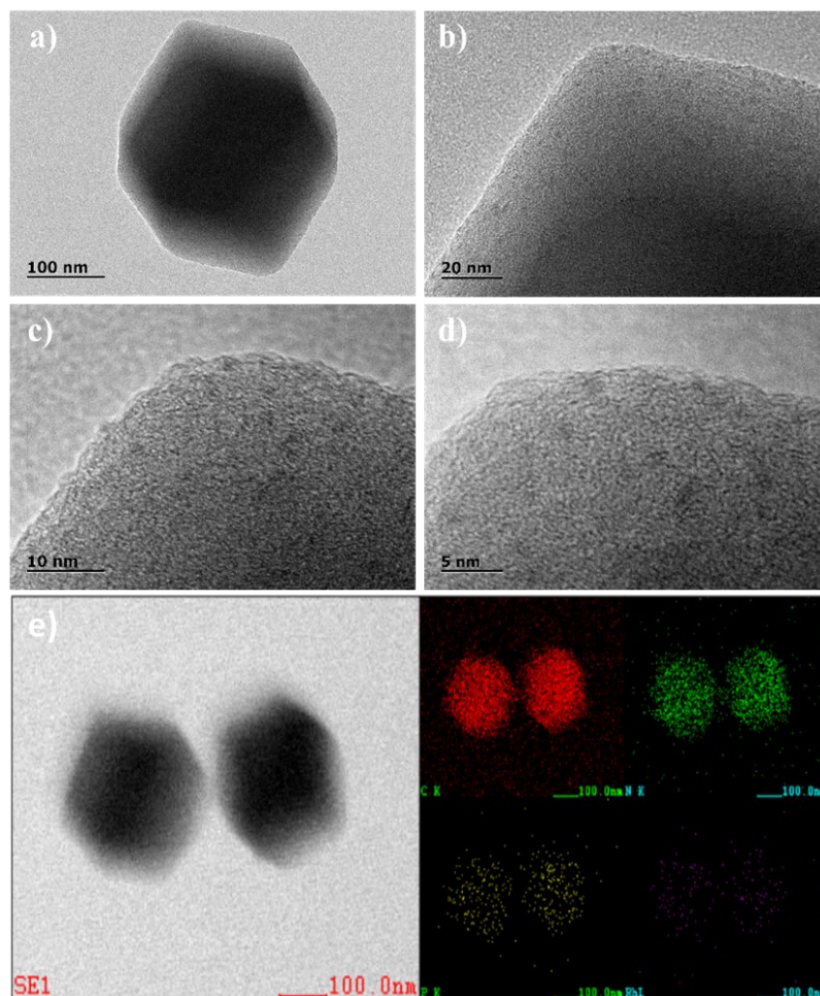

Figure S12. HRTEM (a-d) and EDS mapping (e) analyses of Rh-P-NaBH<sub>4</sub> catalyst after reaction.

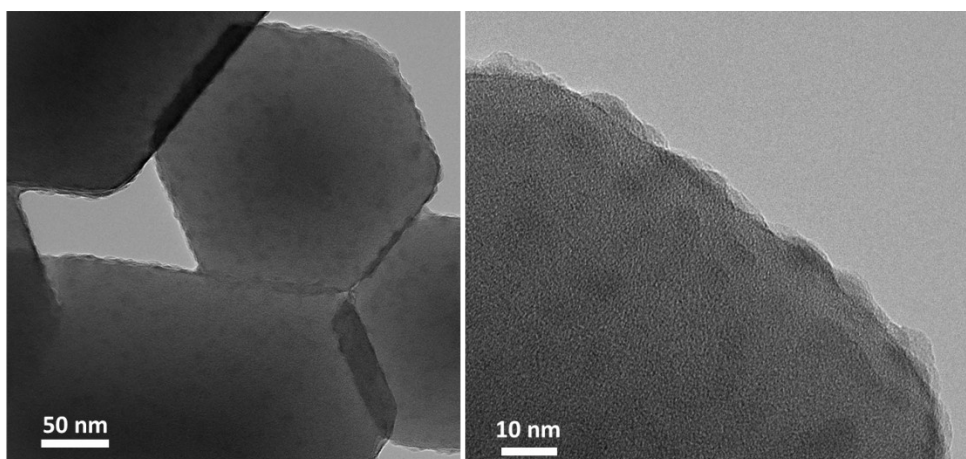

Figure S13. HRTEM images of Rh-P-R300 catalyst after reaction.

Table S1. Nitrogen physisorption analysis for different samples.

| Sample                       | BET surface area<br>(m <sup>2</sup> /g) | Micropore volume<br>(cm <sup>3</sup> /g) | Pore diameter<br>(nm) |
|------------------------------|-----------------------------------------|------------------------------------------|-----------------------|
| ZIF-8                        | 1644.0                                  | 0.64                                     | 2.5                   |
| PPh <sub>3</sub> (3.0)@ZIF-8 | 1304.0                                  | 0.63                                     | 8.7                   |
| Rh-PPh <sub>3</sub>          | 1206.0                                  | 0.62                                     | 9.9                   |
| Rh-P-NaBH <sub>4</sub>       | 1188.4                                  | 0.69                                     | 5.9                   |
| Rh-P-R300                    | 905.1                                   | 0.47                                     | 8.5                   |

Table S2 Catalytic result with Wilkinson catalyst in the hydroformylation of 1-octene.

| Catalyst                             | Conv. (%) | Sel. (%)  |             | Yield <sup>a</sup><br>(%) | L/B <sup>b</sup><br>ratio |
|--------------------------------------|-----------|-----------|-------------|---------------------------|---------------------------|
|                                      |           | Aldehydes | Iso-olefins |                           |                           |
| RhCl(PPh <sub>3</sub> ) <sub>3</sub> | 78.3      | 70.2      | 29.8        | 55.0                      | 1.7                       |
| Rh-P-R300                            | 99.0      | 56.5      | 43.5        | 56.0                      | 0.7                       |

Reaction condition: 1-octene/Rh=130, 1.25 mmol 1-octene, 0.5 mmol 1-hexanol as internal standard, 5 mL toluene, 90 °C, 2 MPa, 2 h. a: refer to the yield of aldehyde. b: L/B ratio refer to the ratio of linear to branched aldehyde in the products.



Table S3 The catalytic results of P-Rh-R300 catalysts with different PPh<sub>3</sub> content

| PPh <sub>3</sub> content<br>(g) | Conv. (%) | Sel. (%)  |             | Yield <sup>a</sup><br>(%) | L/B <sup>b</sup><br>ratio |
|---------------------------------|-----------|-----------|-------------|---------------------------|---------------------------|
|                                 |           | Aldehydes | Iso-olefins |                           |                           |
| 1.0                             | 99.1      | 29.4      | 70.6        | 29.1                      | 0.9                       |
| 2.0                             | 99.5      | 35.8      | 64.2        | 35.6                      | 0.9                       |
| 3.0                             | 99.0      | 56.5      | 43.5        | 56.0                      | 0.7                       |
| 5.0                             | 99.3      | 53.7      | 46.3        | 53.3                      | 0.8                       |

Reaction condition: 1-octene/Rh=130, 1.25 mmol 1-octene, 0.5 mmol 1-hexanol as internal standard, 5 mL toluene, 90 °C, 2 MPa, 2 h. a: refer to the yield of aldehyde. b: L/B ratio refer to the ratio of linear to branched aldehyde in the products.

Table S4 The effect of the value of P/Rh in the homogeneous hydroformylation.

| PPh <sub>3</sub> ligand | mole ratio of<br>P/Rh | Conv. (%) | Sel. (%)  |             | Yield <sup>a</sup><br>(%) | L/B <sup>b</sup><br>ratio |
|-------------------------|-----------------------|-----------|-----------|-------------|---------------------------|---------------------------|
|                         |                       |           | Aldehydes | Iso-olefins |                           |                           |
| no                      | -                     | 73.9      | 27.9      | 72.1        | 20.6                      | 0.6                       |
| 0.005g                  | 19                    | 87.8      | 75.6      | 24.4        | 66.4                      | 1.7                       |
| 0.01g                   | 38                    | 97.1      | 93.8      | 6.2         | 91.1                      | 2.7                       |

Reaction condition: 0.1 mg Rh, 1.25 mmol 1-octene, 0.5 mmol 1-hexanol as internal standard, 5 mL toluene, 90 °C, 2 MPa, 2 h. a: refer to the yield of aldehyde. b: L/B ratio refer to the ratio of linear to branched aldehyde in the products.

Table S5 The ICP results of Rh-P-NaBH<sub>4</sub> and Rh-P-R300 catalysts used for five cycles.

| Catalyst               | Rh content / wt% |      | the leaching of<br>metal Rh /wt% |
|------------------------|------------------|------|----------------------------------|
|                        | fresh            | used |                                  |
| Rh-P-NaBH <sub>4</sub> | 1.02             | 0.82 | 19.6                             |
| Rh-P-R300              | 1.08             | 1.06 | 1.8                              |
